# Supplementary material for: Concurrent Prebiotic Intake Reverses Insulin Resistance Induced by Early-Life Pulsed Antibiotic in Rats
Source: PubMed Central journal article supplement (PMC7827688; doi:10.3390/biomedicines9010066), 2021-01-12
Supplement: biomedicines-09-00066-s001.pdf [file biomedicines-09-00066-s001.pdf]

**Supplemental Table 1: Primer sequences for RT-qPCR**

| <b>Gene</b>                          | <b>Forward Primer (5'-3')</b> | <b>Reverse Primer (5'-3')</b> |
|--------------------------------------|-------------------------------|-------------------------------|
| <b>Liver, Ileum and Hypothalamus</b> |                               |                               |
| IRS-1                                | CTCTGCTTCTGCTTCTGTTAC         | TGGTTATGGTTGGGACTTAGG         |
| IRS-2                                | AAGATAGCGGGTACATGCGAAT        | GCAGCTTAGGGTCTGGGTTCT         |
| ZO-1                                 | AAAGGTGAAACTCTGCTGAG          | GATCTCCAGGAAGACACTTG          |
| Occludin                             | GAGGACTGGCTCAGGGAATATC        | TTGTTGACCTCGTCGAGTTCTG        |
| Muc2                                 | CCACCATTACCACCACCTCAG         | CGATCACCACCATTGCCATTG         |
| MMP9                                 | CATGCGCTGGGCTTAGATCA          | GAGGCCTTGGGTCAGGTTTAGAG       |
| IL-10                                | AGTCAGCCAGACCCACATG           | GCAACCCAAGTAACCCTTAAAG        |
| POMC                                 | AGGTTAAGGAGCAGTGACTAAG        | AGCAGAATCTCGGCATCTTC          |
| AGRP                                 | CGTGCTACTGCCGCTTCTTC          | CCCTGCCTTTGCCAACATC           |
| NPY                                  | GCTCGTGTGTTTGGGCATTC          | GAGATTGATGTAGTGTGCGCAGAG      |
| $\beta$ -Actin                       | ATCAAGATCATTGCTCCTCCTG        | GACTCATCGTACTCCTGCTTG         |
| 18S                                  | TGACTCAACACGGGAAACC           | TCGCTCCACCAACTAAGAAC          |
| GAPDH                                | CAAGTTCAACGGCACAGTCAAG        | ACATACTCAGCACCAGCATCAC        |

**Supplemental Table 2:** Between-group changes in relative abundance of the 15 most abundant bacterial families in male rats after the first, second, third antibiotic pulse and at the end of the study. (n=8-10 rats per group/time point).

- After first antibiotic exposure

| Family/Group              | CTR                       | ABT                       | PRE                       | ABT+PRE                   | LEAN                      |
|---------------------------|---------------------------|---------------------------|---------------------------|---------------------------|---------------------------|
| Peptococcaceae            | 0.002±0.000 <sup>a</sup>  | 0.000±0.000 <sup>b</sup>  | 0.000±0.000 <sup>b</sup>  | 0.000±0.000 <sup>b</sup>  | 0.002±0.000 <sup>a</sup>  |
| Bifidobacteriaceae        | 0.000±0.000 <sup>a</sup>  | 0.000±0.000 <sup>a</sup>  | 0.004±0.002 <sup>b</sup>  | 0.000±0.000 <sup>a</sup>  | 0.000±0.000 <sup>a</sup>  |
| Verrucomicrobiaceae       | 0.030±0.008 <sup>a</sup>  | 0.000±0.000 <sup>b</sup>  | 0.006±0.005 <sup>b</sup>  | 0.000±0.000 <sup>b</sup>  | 0.038±0.010 <sup>a</sup>  |
| Enterococcaceae           | 0.001±0.000 <sup>a</sup>  | 0.046±0.010 <sup>bc</sup> | 0.004±0.001 <sup>ac</sup> | 0.261±0.022 <sup>b</sup>  | 0.000±0.000 <sup>a</sup>  |
| Porphyromonadaceae        | 0.043±0.010 <sup>a</sup>  | 0.000±0.000 <sup>b</sup>  | 0.016±0.005 <sup>ac</sup> | 0.006±0.004 <sup>bc</sup> | 0.014±0.006 <sup>ac</sup> |
| Prevotellaceae            | 0.068±0.017 <sup>a</sup>  | 0.000±0.000 <sup>b</sup>  | 0.001±0.001 <sup>b</sup>  | 0.000±0.000 <sup>b</sup>  | 0.118±0.019 <sup>a</sup>  |
| Erysipelotrichaceae       | 0.021±0.006 <sup>a</sup>  | 0.002±0.000 <sup>b</sup>  | 0.066±0.019 <sup>a</sup>  | 0.001±0.001 <sup>b</sup>  | 0.015±0.003 <sup>a</sup>  |
| Enterobacteriaceae        | 0.014±0.003 <sup>a</sup>  | 0.018±0.008 <sup>a</sup>  | 0.175±0.031 <sup>b</sup>  | 0.205±0.025 <sup>b</sup>  | 0.016±0.004 <sup>a</sup>  |
| Ruminococcaceae           | 0.051±0.007 <sup>a</sup>  | 0.035±0.005 <sup>a</sup>  | 0.001±0.001 <sup>b</sup>  | 0.002±0.001 <sup>b</sup>  | 0.063±0.011 <sup>a</sup>  |
| Bacteroidales_S24-7_group | 0.121±0.019 <sup>a</sup>  | 0.003±0.002 <sup>b</sup>  | 0.003±0.002 <sup>b</sup>  | 0.000±0.000 <sup>b</sup>  | 0.121±0.008 <sup>a</sup>  |
| Peptostreptococcaceae     | 0.041±0.008 <sup>a</sup>  | 0.003±0.001 <sup>b</sup>  | 0.033±0.009 <sup>a</sup>  | 0.000±0.000 <sup>b</sup>  | 0.059±0.010 <sup>a</sup>  |
| Clostridiaceae_1          | 0.011±0.003 <sup>a</sup>  | 0.000±0.000 <sup>b</sup>  | 0.044±0.011 <sup>a</sup>  | 0.000±0.000 <sup>b</sup>  | 0.010±0.002 <sup>a</sup>  |
| Lachnospiraceae           | 0.187±0.036 <sup>ab</sup> | 0.203±0.017 <sup>a</sup>  | 0.120±0.010 <sup>b</sup>  | 0.196±0.022 <sup>ab</sup> | 0.130±0.019 <sup>b</sup>  |
| Bacteroidaceae            | 0.071±0.016 <sup>b</sup>  | 0.605±0.027 <sup>a</sup>  | 0.126±0.026 <sup>bc</sup> | 0.217±0.041 <sup>ac</sup> | 0.066±0.029 <sup>b</sup>  |
| Lactobacillaceae          | 0.323±0.042 <sup>a</sup>  | 0.081±0.012 <sup>b</sup>  | 0.400±0.025 <sup>a</sup>  | 0.111±0.025 <sup>b</sup>  | 0.337±0.049 <sup>a</sup>  |

- After second antibiotic exposure – Males

| Family/Group              | CTR                        | ABT                       | PRE                       | ABT+PRE                   | LEAN                      |
|---------------------------|----------------------------|---------------------------|---------------------------|---------------------------|---------------------------|
| Peptococcaceae            | 0.003±0.001 <sup>a</sup>   | 0.001±0.001 <sup>b</sup>  | 0.000±0.000 <sup>b</sup>  | 0.000±0.000 <sup>b</sup>  | 0.002±0.001 <sup>a</sup>  |
| Bifidobacteriaceae        | 0.002±0.000 <sup>acd</sup> | 0.000±0.000 <sup>b</sup>  | 0.039±0.019 <sup>c</sup>  | 0.000±0.000 <sup>b</sup>  | 0.001±0.000 <sup>bd</sup> |
| Verrucomicrobiaceae       | 0.045±0.014 <sup>a</sup>   | 0.018±0.014 <sup>a</sup>  | 0.000±0.000 <sup>b</sup>  | 0.000±0.000 <sup>b</sup>  | 0.003±0.001 <sup>ab</sup> |
| Enterococcaceae           | 0.000±0.000 <sup>a</sup>   | 0.018±0.006 <sup>bc</sup> | 0.003±0.001 <sup>ac</sup> | 0.088±0.029 <sup>b</sup>  | 0.001±0.001 <sup>a</sup>  |
| Porphyromonadaceae        | 0.096±0.010 <sup>a</sup>   | 0.000±0.000 <sup>b</sup>  | 0.021±0.005 <sup>c</sup>  | 0.105±0.021 <sup>a</sup>  | 0.004±0.001 <sup>bc</sup> |
| Prevotellaceae            | 0.065±0.015 <sup>a</sup>   | 0.000±0.000 <sup>b</sup>  | 0.000±0.000 <sup>b</sup>  | 0.000±0.000 <sup>b</sup>  | 0.187±0.006 <sup>a</sup>  |
| Erysipelotrichaceae       | 0.019±0.004 <sup>a</sup>   | 0.020±0.016 <sup>a</sup>  | 0.206±0.025 <sup>b</sup>  | 0.062±0.035 <sup>a</sup>  | 0.022±0.002 <sup>a</sup>  |
| Enterobacteriaceae        | 0.003±0.002 <sup>a</sup>   | 0.000±0.000 <sup>a</sup>  | 0.121±0.016 <sup>bc</sup> | 0.231±0.037 <sup>b</sup>  | 0.003±0.000 <sup>ac</sup> |
| Ruminococcaceae           | 0.033±0.006 <sup>ac</sup>  | 0.077±0.015 <sup>a</sup>  | 0.002±0.000 <sup>b</sup>  | 0.017±0.006 <sup>bc</sup> | 0.086±0.015 <sup>a</sup>  |
| Bacteroidales_S24-7_group | 0.123±0.021 <sup>a</sup>   | 0.012±0.004 <sup>b</sup>  | 0.000±0.000 <sup>c</sup>  | 0.000±0.000 <sup>c</sup>  | 0.131±0.007 <sup>a</sup>  |
| Peptostreptococcaceae     | 0.089±0.008 <sup>a</sup>   | 0.011±0.007 <sup>bc</sup> | 0.012±0.005 <sup>bc</sup> | 0.003±0.003 <sup>c</sup>  | 0.029±0.008 <sup>ab</sup> |
| Clostridiaceae_1          | 0.129±0.014 <sup>a</sup>   | 0.021±0.012 <sup>b</sup>  | 0.152±0.050 <sup>a</sup>  | 0.037±0.016 <sup>b</sup>  | 0.011±0.005 <sup>b</sup>  |
| Lachnospiraceae           | 0.120±0.024 <sup>ac</sup>  | 0.291±0.026 <sup>b</sup>  | 0.065±0.025 <sup>a</sup>  | 0.224±0.024 <sup>b</sup>  | 0.181±0.019 <sup>bc</sup> |
| Bacteroidaceae            | 0.043±0.010 <sup>ac</sup>  | 0.477±0.024 <sup>b</sup>  | 0.142±0.022 <sup>a</sup>  | 0.181±0.040 <sup>a</sup>  | 0.010±0.003 <sup>c</sup>  |
| Lactobacillaceae          | 0.215±0.037 <sup>a</sup>   | 0.051±0.019 <sup>b</sup>  | 0.230±0.036 <sup>a</sup>  | 0.051±0.050 <sup>b</sup>  | 0.315±0.026 <sup>a</sup>  |

- After third antibiotic exposure – Males

| Family/Group        | CTR                      | ABT                      | PRE                      | ABT+PRE                  | LEAN                     |
|---------------------|--------------------------|--------------------------|--------------------------|--------------------------|--------------------------|
| Peptococcaceae      | 0.002±0.001 <sup>a</sup> | 0.000±0.000 <sup>b</sup> | 0.000±0.000 <sup>b</sup> | 0.000±0.000 <sup>b</sup> | 0.003±0.000 <sup>a</sup> |
| Bifidobacteriaceae  | 0.002±0.001 <sup>a</sup> | 0.000±0.000 <sup>a</sup> | 0.338±0.015 <sup>b</sup> | 0.000±0.000 <sup>a</sup> | 0.001±0.000 <sup>a</sup> |
| Verrucomicrobiaceae | 0.030±0.012 <sup>a</sup> | 0.009±0.005 <sup>a</sup> | 0.000±0.000 <sup>b</sup> | 0.000±0.000 <sup>b</sup> | 0.000±0.000 <sup>b</sup> |

|                           |                           |                           |                           |                           |                            |
|---------------------------|---------------------------|---------------------------|---------------------------|---------------------------|----------------------------|
| Enterococcaceae           | 0.000±0.000 <sup>a</sup>  | 0.011±0.006 <sup>b</sup>  | 0.010±0.003 <sup>b</sup>  | 0.039±0.008 <sup>b</sup>  | 0.000±0.000 <sup>a</sup>   |
| Porphyromonadaceae        | 0.083±0.014 <sup>a</sup>  | 0.000±0.000 <sup>b</sup>  | 0.001±0.001 <sup>bd</sup> | 0.015±0.012 <sup>bc</sup> | 0.006±0.001 <sup>acd</sup> |
| Prevotellaceae            | 0.031±0.007 <sup>a</sup>  | 0.000±0.000 <sup>b</sup>  | 0.000±0.000 <sup>b</sup>  | 0.000±0.000 <sup>b</sup>  | 0.150±0.018 <sup>a</sup>   |
| Erysipelotrichaceae       | 0.007±0.002 <sup>a</sup>  | 0.038±0.004 <sup>bc</sup> | 0.041±0.011 <sup>bc</sup> | 0.134±0.047 <sup>b</sup>  | 0.016±0.002 <sup>ac</sup>  |
| Enterobacteriaceae        | 0.002±0.000 <sup>a</sup>  | 0.000±0.000 <sup>a</sup>  | 0.022±0.008 <sup>b</sup>  | 0.026±0.011 <sup>b</sup>  | 0.001±0.000 <sup>a</sup>   |
| Ruminococcaceae           | 0.029±0.009 <sup>ad</sup> | 0.069±0.011 <sup>ac</sup> | 0.000±0.000 <sup>b</sup>  | 0.003±0.001 <sup>bd</sup> | 0.120±0.13 <sup>c</sup>    |
| Bacteroidales_S24-7_group | 0.131±0.023 <sup>a</sup>  | 0.021±0.005 <sup>a</sup>  | 0.000±0.000 <sup>b</sup>  | 0.000±0.000 <sup>b</sup>  | 0.132±0.017 <sup>a</sup>   |
| Peptostreptococcaceae     | 0.104±0.012 <sup>a</sup>  | 0.021±0.015 <sup>bc</sup> | 0.001±0.001 <sup>b</sup>  | 0.003±0.002 <sup>b</sup>  | 0.052±0.012 <sup>ac</sup>  |
| Clostridiaceae_1          | 0.149±0.024 <sup>a</sup>  | 0.030±0.015 <sup>b</sup>  | 0.031±0.017 <sup>b</sup>  | 0.214±0.058 <sup>a</sup>  | 0.041±0.014 <sup>b</sup>   |
| Lachnospiraceae           | 0.079±0.024 <sup>ac</sup> | 0.249±0.014 <sup>b</sup>  | 0.008±0.005 <sup>a</sup>  | 0.017±0.010 <sup>a</sup>  | 0.165±0.011 <sup>bc</sup>  |
| Bacteroidaceae            | 0.030±0.007 <sup>a</sup>  | 0.452±0.029 <sup>b</sup>  | 0.017±0.007 <sup>a</sup>  | 0.049±0.033 <sup>a</sup>  | 0.006±0.002 <sup>a</sup>   |
| Lactobacillaceae          | 0.307±0.036 <sup>a</sup>  | 0.092±0.036 <sup>b</sup>  | 0.530±0.031 <sup>c</sup>  | 0.499±0.082 <sup>ac</sup> | 0.300±0.037 <sup>a</sup>   |

- End of Study – Males

| Family/Group              | CTR                       | ABT                       | PRE                       | ABT+PRE                   | LEAN                      |
|---------------------------|---------------------------|---------------------------|---------------------------|---------------------------|---------------------------|
| Peptococcaceae            | 0.004±0.000               | 0.006±0.001               | 0.004±0.001               | 0.004±0.000               | 0.003±0.000               |
| Bifidobacteriaceae        | 0.000±0.000 <sup>a</sup>  | 0.000±0.000 <sup>a</sup>  | 0.000±0.000 <sup>a</sup>  | 0.000±0.000 <sup>a</sup>  | 0.000±0.000 <sup>a</sup>  |
| Verrucomicrobiaceae       | 0.005±0.004 <sup>a</sup>  | 0.079±0.013 <sup>b</sup>  | 0.050±0.009 <sup>b</sup>  | 0.060±0.015 <sup>b</sup>  | 0.000±0.000 <sup>a</sup>  |
| Enterococcaceae           | 0.000±0.000 <sup>a</sup>  | 0.001±0.000 <sup>a</sup>  | 0.005±0.003 <sup>a</sup>  | 0.001±0.000 <sup>a</sup>  | 0.000±0.000 <sup>a</sup>  |
| Porphyromonadaceae        | 0.023±0.003 <sup>ac</sup> | 0.051±0.008 <sup>b</sup>  | 0.037±0.005 <sup>ab</sup> | 0.034±0.007 <sup>ab</sup> | 0.007±0.001 <sup>c</sup>  |
| Prevotellaceae            | 0.019±0.004 <sup>a</sup>  | 0.000±0.000 <sup>b</sup>  | 0.000±0.000 <sup>b</sup>  | 0.001±0.000 <sup>b</sup>  | 0.130±0.012 <sup>a</sup>  |
| Erysipelotrichaceae       | 0.015±0.006 <sup>a</sup>  | 0.017±0.004 <sup>a</sup>  | 0.040±0.010 <sup>a</sup>  | 0.015±0.003 <sup>a</sup>  | 0.032±0.013 <sup>a</sup>  |
| Enterobacteriaceae        | 0.001±0.000 <sup>ac</sup> | 0.003±0.000 <sup>b</sup>  | 0.002±0.000 <sup>ab</sup> | 0.002±0.000 <sup>ab</sup> | 0.000±0.000 <sup>c</sup>  |
| Ruminococcaceae           | 0.040±0.005 <sup>a</sup>  | 0.071±0.011 <sup>a</sup>  | 0.046±0.007 <sup>a</sup>  | 0.054±0.011 <sup>a</sup>  | 0.147±0.018 <sup>b</sup>  |
| Bacteroidales_S24-7_group | 0.138±0.013 <sup>a</sup>  | 0.015±0.002 <sup>b</sup>  | 0.021±0.010 <sup>b</sup>  | 0.022±0.004 <sup>b</sup>  | 0.136±0.021 <sup>a</sup>  |
| Peptostreptococcaceae     | 0.144±0.013 <sup>a</sup>  | 0.084±0.012 <sup>bc</sup> | 0.172±0.012 <sup>a</sup>  | 0.132±0.017 <sup>ac</sup> | 0.080±0.019 <sup>bc</sup> |
| Clostridiaceae_1          | 0.198±0.016 <sup>a</sup>  | 0.174±0.034 <sup>a</sup>  | 0.226±0.020 <sup>a</sup>  | 0.140±0.033 <sup>a</sup>  | 0.019±0.007 <sup>b</sup>  |
| Lachnospiraceae           | 0.078±0.006 <sup>a</sup>  | 0.135±0.017 <sup>ab</sup> | 0.109±0.014 <sup>ab</sup> | 0.113±0.018 <sup>ab</sup> | 0.178±0.026 <sup>b</sup>  |
| Bacteroidaceae            | 0.017±0.004 <sup>ad</sup> | 0.172±0.022 <sup>b</sup>  | 0.064±0.011 <sup>cd</sup> | 0.128±0.011 <sup>bc</sup> | 0.008±0.002 <sup>a</sup>  |
| Lactobacillaceae          | 0.294±0.040               | 0.183±0.020               | 0.210±0.037               | 0.189±0.046               | 0.249±0.043               |

Values displayed are mean±SE (relative abundance). Kruskal-Wallis test with Dunn post-hoc tests and Benjamin-Holmes False Discovery Rate (FDR) correction;  $P < 0.05$ . CTR, control; ABT, antibiotic; PRE, prebiotic; ABT+PRE, antibiotic+prebiotic; LEAN, lean control.

**Supplemental Table 3:** Between-group changes in relative abundance of the 15 most abundant bacterial families in female rats after the first, second, third antibiotic pulse and at the end of the study. (n=8-10 rats per group/time point).

• After first antibiotic exposure – Females

| Family/Group              | CTR                      | ABT                       | PRE                        | ABT+PRE                   | LEAN                      |
|---------------------------|--------------------------|---------------------------|----------------------------|---------------------------|---------------------------|
| Peptococcaceae            | 0.004±0.001 <sup>a</sup> | 0.000±0.000 <sup>b</sup>  | 0.000±0.000 <sup>b</sup>   | 0.000±0.000 <sup>b</sup>  | 0.003±0.001 <sup>a</sup>  |
| Bifidobacteriaceae        | 0.000±0.000 <sup>a</sup> | 0.000±0.000 <sup>a</sup>  | 0.022±0.011 <sup>b</sup>   | 0.000±0.000 <sup>a</sup>  | 0.000±0.000 <sup>a</sup>  |
| Enterococcaceae           | 0.004±0.002 <sup>a</sup> | 0.063±0.011 <sup>b</sup>  | 0.002±0.001 <sup>a</sup>   | 0.229±0.035 <sup>b</sup>  | 0.001±0.000 <sup>a</sup>  |
| Verrucomicrobiaceae       | 0.056±0.017 <sup>a</sup> | 0.001±0.000 <sup>bd</sup> | 0.010±0.004 <sup>acd</sup> | 0.000±0.000 <sup>b</sup>  | 0.030±0.011 <sup>c</sup>  |
| Porphyromonadaceae        | 0.037±0.008 <sup>a</sup> | 0.000±0.000 <sup>b</sup>  | 0.018±0.007 <sup>ac</sup>  | 0.006±0.003 <sup>bc</sup> | 0.005±0.002 <sup>bc</sup> |
| Enterobacteriaceae        | 0.014±0.003 <sup>a</sup> | 0.014±0.005 <sup>a</sup>  | 0.126±0.033 <sup>b</sup>   | 0.193±0.030 <sup>b</sup>  | 0.008±0.002 <sup>a</sup>  |
| Erysipelotrichaceae       | 0.021±0.004 <sup>a</sup> | 0.001±0.001 <sup>b</sup>  | 0.078±0.013 <sup>a</sup>   | 0.008±0.007 <sup>b</sup>  | 0.009±0.001 <sup>b</sup>  |
| Prevotellaceae            | 0.065±0.013 <sup>a</sup> | 0.000±0.000 <sup>b</sup>  | 0.001±0.001 <sup>b</sup>   | 0.000±0.000 <sup>b</sup>  | 0.131±0.010 <sup>a</sup>  |
| Ruminococcaceae           | 0.064±0.009 <sup>a</sup> | 0.024±0.004 <sup>ab</sup> | 0.003±0.003 <sup>b</sup>   | 0.003±0.002 <sup>b</sup>  | 0.068±0.011 <sup>a</sup>  |
| Peptostreptococcaceae     | 0.050±0.008 <sup>a</sup> | 0.002±0.000 <sup>b</sup>  | 0.036±0.010 <sup>a</sup>   | 0.001±0.001 <sup>b</sup>  | 0.046±0.008 <sup>a</sup>  |
| Bacteroidales_S24-7_group | 0.153±0.017 <sup>a</sup> | 0.007±0.003 <sup>b</sup>  | 0.008±0.003 <sup>b</sup>   | 0.000±0.000 <sup>b</sup>  | 0.134±0.010 <sup>a</sup>  |
| Clostridiaceae_1          | 0.048±0.024 <sup>a</sup> | 0.000±0.000 <sup>b</sup>  | 0.022±0.005 <sup>a</sup>   | 0.000±0.000 <sup>b</sup>  | 0.0122±0.003 <sup>a</sup> |
| Bacteroidaceae            | 0.070±0.009 <sup>a</sup> | 0.548±0.031 <sup>b</sup>  | 0.117±0.023 <sup>ac</sup>  | 0.208±0.019 <sup>bc</sup> | 0.016±0.009 <sup>a</sup>  |
| Lachnospiraceae           | 0.168±0.019 <sup>a</sup> | 0.189±0.013 <sup>a</sup>  | 0.132±0.016 <sup>a</sup>   | 0.162±0.024 <sup>a</sup>  | 0.143±0.013 <sup>a</sup>  |
| Lactobacillaceae          | 0.232±0.023 <sup>a</sup> | 0.147±0.036 <sup>a</sup>  | 0.419±0.032 <sup>b</sup>   | 0.188±0.050 <sup>a</sup>  | 0.383±0.025 <sup>b</sup>  |

• After second antibiotic exposure – Females

| Family/Group              | CTR                       | ABT                       | PRE                       | ABT+PRE                   | LEAN                      |
|---------------------------|---------------------------|---------------------------|---------------------------|---------------------------|---------------------------|
| Peptococcaceae            | 0.004±0.001 <sup>a</sup>  | 0.000±0.000 <sup>b</sup>  | 0.000±0.000 <sup>b</sup>  | 0.000±0.000 <sup>b</sup>  | 0.004±0.001 <sup>a</sup>  |
| Bifidobacteriaceae        | 0.001±0.000 <sup>a</sup>  | 0.000±0.000 <sup>a</sup>  | 0.071±0.028 <sup>b</sup>  | 0.000±0.000 <sup>a</sup>  | 0.000±0.000 <sup>a</sup>  |
| Enterococcaceae           | 0.001±0.001 <sup>ac</sup> | 0.009±0.004 <sup>b</sup>  | 0.003±0.001 <sup>bc</sup> | 0.059±0.016 <sup>b</sup>  | 0.000±0.000 <sup>a</sup>  |
| Verrucomicrobiaceae       | 0.060±0.017 <sup>a</sup>  | 0.015±0.012 <sup>b</sup>  | 0.000±0.000 <sup>b</sup>  | 0.000±0.000 <sup>b</sup>  | 0.001±0.001 <sup>b</sup>  |
| Porphyromonadaceae        | 0.089±0.010 <sup>a</sup>  | 0.000±0.000 <sup>b</sup>  | 0.019±0.004 <sup>c</sup>  | 0.149±0.023 <sup>a</sup>  | 0.005±0.001 <sup>bc</sup> |
| Enterobacteriaceae        | 0.005±0.002 <sup>ac</sup> | 0.000±0.000 <sup>a</sup>  | 0.094±0.014 <sup>bc</sup> | 0.215±0.036 <sup>b</sup>  | 0.002±0.001 <sup>a</sup>  |
| Erysipelotrichaceae       | 0.022±0.004 <sup>a</sup>  | 0.011±0.003 <sup>a</sup>  | 0.195±0.035 <sup>b</sup>  | 0.083±0.045 <sup>a</sup>  | 0.015±0.035 <sup>a</sup>  |
| Prevotellaceae            | 0.056±0.015 <sup>a</sup>  | 0.000±0.000 <sup>b</sup>  | 0.000±0.000 <sup>b</sup>  | 0.000±0.000 <sup>b</sup>  | 0.191±0.009 <sup>a</sup>  |
| Ruminococcaceae           | 0.032±0.004 <sup>ac</sup> | 0.075±0.011 <sup>a</sup>  | 0.002±0.001 <sup>b</sup>  | 0.013±0.005 <sup>bc</sup> | 0.087±0.008 <sup>a</sup>  |
| Peptostreptococcaceae     | 0.089±0.006 <sup>a</sup>  | 0.030±0.026 <sup>b</sup>  | 0.009±0.003 <sup>bc</sup> | 0.000±0.000 <sup>c</sup>  | 0.038±0.013 <sup>ab</sup> |
| Bacteroidales_S24-7_group | 0.120±0.014 <sup>ac</sup> | 0.009±0.003 <sup>ab</sup> | 0.000±0.000 <sup>b</sup>  | 0.000±0.000 <sup>b</sup>  | 0.153±0.010 <sup>c</sup>  |
| Clostridiaceae_1          | 0.125±0.021 <sup>a</sup>  | 0.026±0.014 <sup>b</sup>  | 0.144±0.022 <sup>a</sup>  | 0.078±0.034 <sup>ab</sup> | 0.017±0.009 <sup>b</sup>  |
| Bacteroidaceae            | 0.068±0.018 <sup>ac</sup> | 0.477±0.029 <sup>b</sup>  | 0.131±0.067 <sup>c</sup>  | 0.152±0.043 <sup>c</sup>  | 0.009±0.002 <sup>a</sup>  |
| Lachnospiraceae           | 0.109±0.017 <sup>a</sup>  | 0.270±0.017 <sup>b</sup>  | 0.064±0.016 <sup>a</sup>  | 0.238±0.031 <sup>b</sup>  | 0.135±0.016 <sup>a</sup>  |
| Lactobacillaceae          | 0.203±0.002 <sup>ac</sup> | 0.067±0.016 <sup>bc</sup> | 0.262±0.056 <sup>a</sup>  | 0.012±0.004 <sup>b</sup>  | 0.327±0.018 <sup>a</sup>  |

• After third antibiotic exposure – Females

| Family/Group       | CTR                      | ABT                      | PRE                      | ABT+PRE                  | LEAN                     |
|--------------------|--------------------------|--------------------------|--------------------------|--------------------------|--------------------------|
| Peptococcaceae     | 0.003±0.001 <sup>a</sup> | 0.000±0.000 <sup>b</sup> | 0.000±0.000 <sup>b</sup> | 0.000±0.000 <sup>b</sup> | 0.002±0.000 <sup>a</sup> |
| Bifidobacteriaceae | 0.001±0.001 <sup>a</sup> | 0.000±0.000 <sup>a</sup> | 0.308±0.047 <sup>b</sup> | 0.000±0.000 <sup>a</sup> | 0.000±0.000 <sup>a</sup> |

|                                                              |                           |                           |                           |                           |                           |
|--------------------------------------------------------------|---------------------------|---------------------------|---------------------------|---------------------------|---------------------------|
| Enterococcaceae                                              | 0.000±0.000 <sup>a</sup>  | 0.001±0.000 <sup>ab</sup> | 0.011±0.003 <sup>bc</sup> | 0.050±0.013 <sup>c</sup>  | 0.000±0.000 <sup>a</sup>  |
| Verrucomicrobiaceae                                          | 0.068±0.027 <sup>a</sup>  | 0.035±0.015 <sup>a</sup>  | 0.000±0.000 <sup>b</sup>  | 0.000±0.000 <sup>b</sup>  | 0.001±0.001 <sup>b</sup>  |
| Porphyromonadaceae                                           | 0.093±0.022 <sup>a</sup>  | 0.000±0.000 <sup>b</sup>  | 0.001±0.001 <sup>b</sup>  | 0.001±0.000 <sup>b</sup>  | 0.007±0.001 <sup>a</sup>  |
| Enterobacteriaceae                                           | 0.006±0.002 <sup>bc</sup> | 0.000±0.000 <sup>a</sup>  | 0.024±0.006 <sup>b</sup>  | 0.004±0.001 <sup>ab</sup> | 0.001±0.000 <sup>ac</sup> |
| Erysipelotrichaceae                                          | 0.008±0.001 <sup>a</sup>  | 0.029±0.006 <sup>a</sup>  | 0.112±0.026 <sup>a</sup>  | 0.092±0.016 <sup>a</sup>  | 0.008±0.002 <sup>a</sup>  |
| Prevotellaceae                                               | 0.036±0.003 <sup>a</sup>  | 0.000±0.000 <sup>b</sup>  | 0.000±0.000 <sup>b</sup>  | 0.000±0.000 <sup>b</sup>  | 0.182±0.010 <sup>a</sup>  |
| Ruminococcaceae                                              | 0.028±0.006 <sup>ab</sup> | 0.1503±0.015 <sup>a</sup> | 0.001±0.000 <sup>b</sup>  | 0.004±0.001 <sup>b</sup>  | 0.094±0.016 <sup>a</sup>  |
| Peptostreptococcaceae                                        | 0.127±0.015 <sup>a</sup>  | 0.011±0.008 <sup>b</sup>  | 0.014±0.006 <sup>bc</sup> | 0.002±0.001 <sup>b</sup>  | 0.050±0.017 <sup>ac</sup> |
| Bacteroidales_S24-7_group                                    | 0.123±0.019 <sup>ab</sup> | 0.014±0.002 <sup>b</sup>  | 0.000±0.000 <sup>c</sup>  | 0.000±0.000 <sup>c</sup>  | 0.150±0.007 <sup>a</sup>  |
| Clostridiaceae_1                                             | 0.138±0.019 <sup>ac</sup> | 0.018±0.013 <sup>b</sup>  | 0.112±0.038 <sup>ad</sup> | 0.493±0.056 <sup>c</sup>  | 0.019±0.012 <sup>bd</sup> |
| Bacteroidaceae                                               | 0.030±0.009 <sup>a</sup>  | 0.459±0.017 <sup>b</sup>  | 0.016±0.010 <sup>a</sup>  | 0.013±0.005 <sup>a</sup>  | 0.008±0.002 <sup>a</sup>  |
| Lachnospiraceae                                              | 0.073±0.008 <sup>ac</sup> | 0.245±0.019 <sup>b</sup>  | 0.006±0.002 <sup>a</sup>  | 0.016±0.008 <sup>a</sup>  | 0.128±0.015 <sup>bc</sup> |
| Lactobacillaceae<br>(Adjusted p value between C and A =0.06) | 0.253±0.030 <sup>ac</sup> | 0.079±0.020 <sup>bc</sup> | 0.394±0.047 <sup>a</sup>  | 0.326±0.045 <sup>a</sup>  | 0.342±0.038 <sup>a</sup>  |

- End of Study – Females

| Family/Group              | CTR                       | ABT                       | PRE                       | ABT+PRE                   | LEAN                      |
|---------------------------|---------------------------|---------------------------|---------------------------|---------------------------|---------------------------|
| Peptococcaceae            | 0.007±0.001 <sup>ab</sup> | 0.008±0.001 <sup>a</sup>  | 0.007±0.001 <sup>ab</sup> | 0.009±0.001 <sup>a</sup>  | 0.004±0.000 <sup>b</sup>  |
| Bifidobacteriaceae        | 0.001±0.000 <sup>a</sup>  | 0.000±0.000 <sup>a</sup>  | 0.000±0.000 <sup>a</sup>  | 0.000±0.000 <sup>a</sup>  | 0.000±0.000 <sup>a</sup>  |
| Enterococcaceae           | 0.002±0.001 <sup>a</sup>  | 0.000±0.000 <sup>b</sup>  | 0.000±0.000 <sup>b</sup>  | 0.002±0.001 <sup>a</sup>  | 0.000±0.000 <sup>b</sup>  |
| Verrucomicrobiaceae       | 0.007±0.003 <sup>a</sup>  | 0.068±0.015 <sup>b</sup>  | 0.062±0.018 <sup>b</sup>  | 0.066±0.014 <sup>b</sup>  | 0.000±0.000 <sup>a</sup>  |
| Porphyromonadaceae        | 0.030±0.005 <sup>a</sup>  | 0.051±0.011 <sup>a</sup>  | 0.057±0.005 <sup>a</sup>  | 0.048±0.009 <sup>a</sup>  | 0.003±0.001 <sup>b</sup>  |
| Enterobacteriaceae        | 0.001±0.000 <sup>a</sup>  | 0.001±0.000 <sup>a</sup>  | 0.002±0.001 <sup>a</sup>  | 0.003±0.001 <sup>a</sup>  | 0.001±0.000 <sup>a</sup>  |
| Erysipelotrichaceae       | 0.029±0.006 <sup>a</sup>  | 0.007±0.002 <sup>b</sup>  | 0.048±0.008 <sup>a</sup>  | 0.009±0.002 <sup>b</sup>  | 0.054±0.025 <sup>a</sup>  |
| Prevotellaceae            | 0.032±0.008 <sup>ac</sup> | 0.004±0.004 <sup>b</sup>  | 0.007±0.004 <sup>b</sup>  | 0.024±0.016 <sup>ab</sup> | 0.160±0.020 <sup>c</sup>  |
| Ruminococcaceae           | 0.064±0.008 <sup>a</sup>  | 0.086±0.013 <sup>a</sup>  | 0.048±0.007 <sup>a</sup>  | 0.069±0.006 <sup>a</sup>  | 0.159±0.018 <sup>b</sup>  |
| Peptostreptococcaceae     | 0.164±0.015 <sup>ab</sup> | 0.117±0.017 <sup>b</sup>  | 0.223±0.006 <sup>a</sup>  | 0.126±0.020 <sup>b</sup>  | 0.087±0.024 <sup>b</sup>  |
| Bacteroidales_S24-7_group | 0.214±0.014 <sup>a</sup>  | 0.032±0.005 <sup>b</sup>  | 0.107±0.026 <sup>bc</sup> | 0.060±0.012 <sup>b</sup>  | 0.146±0.012 <sup>ac</sup> |
| Clostridiaceae_1          | 0.160±0.016 <sup>a</sup>  | 0.127±0.025 <sup>a</sup>  | 0.158±0.017 <sup>a</sup>  | 0.155±0.023 <sup>a</sup>  | 0.034±0.015 <sup>b</sup>  |
| Bacteroidaceae            | 0.012±0.002 <sup>ac</sup> | 0.187±0.014 <sup>b</sup>  | 0.052±0.006 <sup>cd</sup> | 0.141±0.021 <sup>bd</sup> | 0.010±0.003 <sup>a</sup>  |
| Lachnospiraceae           | 0.105±0.016 <sup>a</sup>  | 0.147±0.016 <sup>a</sup>  | 0.102±0.012 <sup>a</sup>  | 0.144±0.009 <sup>a</sup>  | 0.111±0.017 <sup>a</sup>  |
| Lactobacillaceae          | 0.150±0.024 <sup>ab</sup> | 0.151±0.035 <sup>ab</sup> | 0.119±0.015 <sup>a</sup>  | 0.134±0.014 <sup>ab</sup> | 0.222±0.022 <sup>b</sup>  |

Values displayed are mean±SE (relative abundance). Kruskal-Wallis test with Dunn post-hoc tests and Benjamin-Holmes False Discovery Rate (FDR) correction;  $P < 0.05$ . CTR, control; ABT, antibiotic; PRE, prebiotic; ABT+PRE, antibiotic+prebiotic; LEAN, lean control.

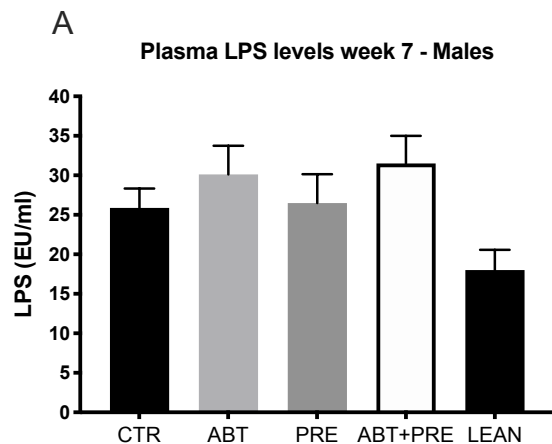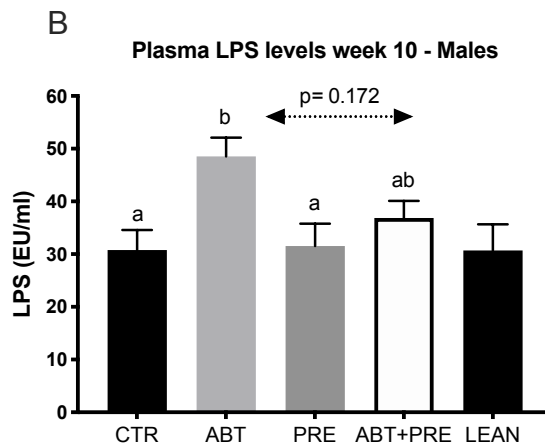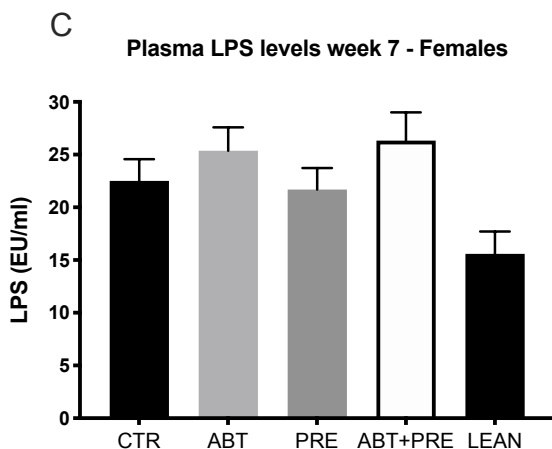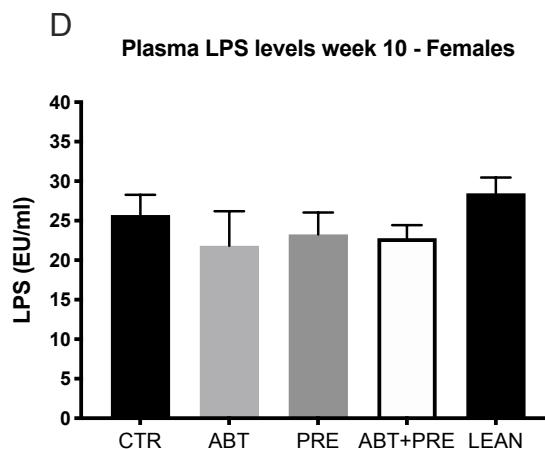

**Supplemental Figure 1: ABT male offspring display increased endotoxemia at the end of the study.** (A and B) Circulating LPS levels in males at (A) week 7 of life and (B) end of the study (n=8-10 rats per group/time point). (C and D) Circulating LPS levels in females at (C) week 7 of life and (D) end of the study (n=8-10 rats per group/time point). Different superscript letters denote significant differences between the groups,  $p < 0.05$ . CTR, control; ATB, antibiotic; PRE, prebiotic; ATB+PRE, antibiotic+prebiotic; LEAN, lean control.
